# Supplementary material for: Association Between IV Contrast Media Exposure and Acute Kidney Injury in Patients Requiring Emergency Admission: A Nationwide Observational Study in Japan
Source: PubMed Central journal article supplement — Crit Care Explor. 2024 Aug 26;6(9):e1142. doi: 10.1097/CCE.0000000000001142 (PMC11350338; doi:10.1097/cce.0000000000001142), 2024-08-26
Supplement: cc9-6-e1142-s001.pdf [file cc9-6-e1142-s001.pdf]

**Association between intravenous contrast media exposure and acute kidney injury in patients requiring emergency admission: a nationwide observational study in Japan**

Ryo Hisamune, MD<sup>1</sup>, Kazuma Yamakawa, PhD<sup>1</sup>, Yutaka Umemura, PhD<sup>2</sup>, Noritaka Ushio, MD<sup>1</sup>, Katsunori Mochizuki, PhD<sup>1</sup>, Ryota Inokuchi, PhD<sup>3</sup>, Kent Doi, PhD<sup>3</sup> and Akira Takasu, PhD<sup>1</sup>

<sup>1</sup> Department of Emergency and Critical Care Medicine, Osaka Medical and Pharmaceutical University, Osaka, Japan

<sup>2</sup> Division of Trauma and Surgical Critical Care, Osaka General Medical Center, Osaka, Japan

<sup>3</sup> Department of Emergency and Critical Care Medicine, Graduate School of Medicine, The University of Tokyo Hospital, Tokyo, Japan

**ONLINE SUPPLEMENT MATERIAL**

Table of contents

- Supplemental Figure 1
- Legend
- Supplemental Table 1

- Supplemental Table 2
- Supplemental Table 3
- Supplemental Table 4
- Supplemental Table 5
- Supplemental Table 6
- Supplemental Table 7
- Supplemental Table 8
- Supplemental Table 9

# Supplemental Figure 1

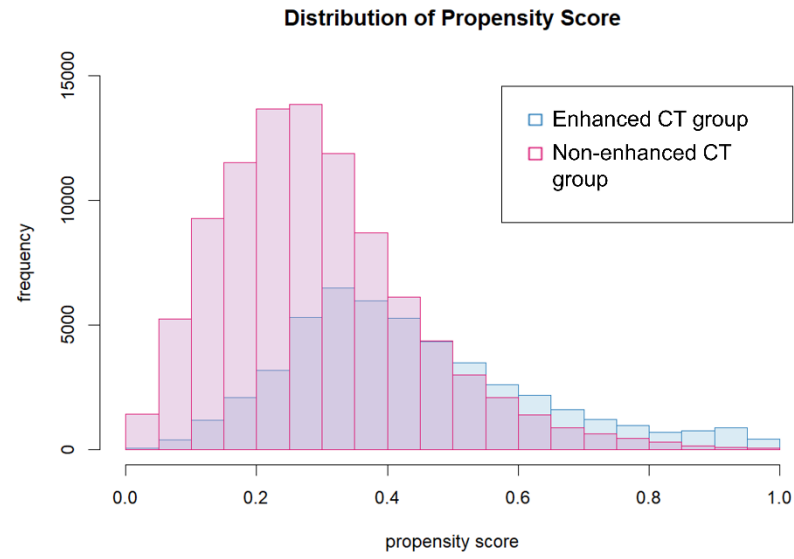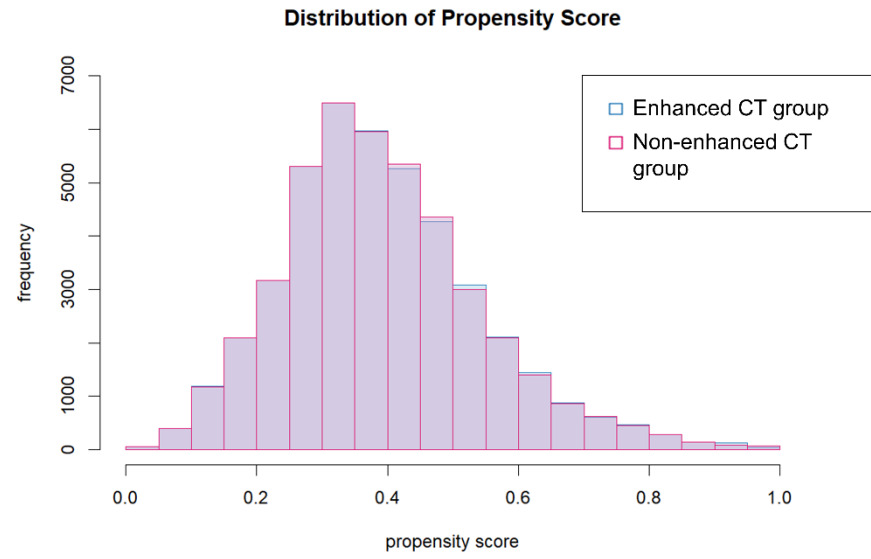

## Legend

**Supplemental Figure 1.** Distribution of propensity scores in the enhanced CT group and non-enhanced CT group before and after propensity score matching. The left-hand figure shows the distribution of propensity scores before propensity score matching. The right-hand figure shows the distribution of propensity scores after propensity score matching. *CT* computed tomography

## Supplemental Table 1

**Supplemental Table S1. Definition of the presence of past history, primary diagnosis, and comorbid disease**

| Group                    | Code type                             | ICD-10 code                                                                                                                                                                                                                                                                                                                                                                                                                                                                                |
|--------------------------|---------------------------------------|--------------------------------------------------------------------------------------------------------------------------------------------------------------------------------------------------------------------------------------------------------------------------------------------------------------------------------------------------------------------------------------------------------------------------------------------------------------------------------------------|
| Past history             |                                       |                                                                                                                                                                                                                                                                                                                                                                                                                                                                                            |
| Congestive heart failure | ICD-10 codes in the complication      | I09.9, I11.0, I13.0, I13.2, I25.5, I42.0, I42.5– I42.9, I43.x, I50.x, P29.0                                                                                                                                                                                                                                                                                                                                                                                                                |
| Diabetic nephropathy     | ICD-10 codes in the complication      | E10.2X and E11.2X                                                                                                                                                                                                                                                                                                                                                                                                                                                                          |
| Chronic kidney disease   | ICD-10 codes in the complication      | N18.X except for N18.0 and N18.5                                                                                                                                                                                                                                                                                                                                                                                                                                                           |
| End-stage renal disease  | ICD-10 codes in the complication      | N18.0 and N18.5                                                                                                                                                                                                                                                                                                                                                                                                                                                                            |
| Hypertension             | ICD-10 codes in the complication      | I11.x, I12.x, I15.x                                                                                                                                                                                                                                                                                                                                                                                                                                                                        |
| Myocardial infarction    | ICD-10 codes in the complication      | I21.x, I22.x, I25.2                                                                                                                                                                                                                                                                                                                                                                                                                                                                        |
| Primary diagnosis        |                                       |                                                                                                                                                                                                                                                                                                                                                                                                                                                                                            |
| Trauma                   | ICD-10 codes in the primary diagnosis | S00.0-S99.9, T00.0-T14.9                                                                                                                                                                                                                                                                                                                                                                                                                                                                   |
| Macrovascular disease    | ICD-10 codes in the primary diagnosis | I26.0-I28.9, I70.0-79.9                                                                                                                                                                                                                                                                                                                                                                                                                                                                    |
| Cerebrovascular disease  | ICD-10 codes in the primary diagnosis | I60.0-I69.8                                                                                                                                                                                                                                                                                                                                                                                                                                                                                |
| Sepsis                   | ICD-10 codes in the primary diagnosis | A00.0-A09.x, A19.0-A28.x, A31.0-A32.x, A36.0-A39.x, A42.x-<br>A46.X, A48.0-A49.x, A59.x, A65.x, A69.x, A74.x, A75.x, A77.x-<br>A81.x, A83.x-A96.x, A98.x-99.x, B00.x-10.x, B25.x-27.x, B29.4,<br>B33.x-34.x, B37.x-50.x, B54.x-55.x, B58.x-60.x, B64.0, B67.x, B91.x,<br>B95.0-B99.x, G00.0-G08.x, G14.x, H05.0x, H60.2, H70.0, I00.x,<br>I02.x, I26.0, I26.9, I33.x, I38.x-I40.x, I76.x, I96.x, I98.1, J01.0-J06.x,<br>J09.x-J22.x, J36.x, J39.x, J85.x-J86.x, K35.0-K37.x, K57.x, K61.x, |

|                             |                                                           |                                                                                                                                                                                                                                                                              |
|-----------------------------|-----------------------------------------------------------|------------------------------------------------------------------------------------------------------------------------------------------------------------------------------------------------------------------------------------------------------------------------------|
|                             |                                                           | K63.0, K63.1, K65.x, K75.0, K75.1, K75.3, K76.3, K77.0, K81.x, K83.0, K95.0, K95.8, L02.0-L08.x, M00.x-M08.x, M86.x, M89.6, N10.x, N15.x, N30.x, N39.0, N41.x, N45.x, N70.0-N77.x, R78.8, T80.2, T81.4, T82.6, T82.7, T83.5, T83.6, T84.5, T84.6, T84.7, T85.7, T88.0, U04.x |
| Organ dysfunction           | ICD-10 codes in the primary diagnosis                     | D65.x, D69.5, E87.2-E87.9, G93.4, I46.x, I95x, J80.x, J95.2, J95.3, J95.x, K72.x, N00.x-N18.x, R09.x, R40.0-R40.4, R41.8, R55.x, R57.x                                                                                                                                       |
| Charlson Comorbidity Index  |                                                           |                                                                                                                                                                                                                                                                              |
| Myocardial infarction       | ICD 10 codes in the concomitant or complication diagnoses | I21.x, I22.x, I25.2                                                                                                                                                                                                                                                          |
| Congestive heart failure    | ICD 10 codes in the concomitant or complication diagnoses | I09.9, I11.0, I13.0, I13.2, I25.5, I42.0, I42.5-I42.9, I43.x, I50.x, P29.0                                                                                                                                                                                                   |
| Peripheral vascular disease | ICD 10 codes in the concomitant or complication diagnoses | I70.x, I71.x, I73.1, I73.8, I73.9, I77.1, I79.0, I79.2, K55.1, K55.8, K55.9, Z95.8, Z95.9                                                                                                                                                                                    |
| Cerebrovascular disease     | ICD 10 codes in the concomitant or complication diagnoses | G45.x, G46.x, H34.0, I60.x-I69.x                                                                                                                                                                                                                                             |
| Dementia                    | ICD 10 codes in the concomitant or complication diagnoses | F00.x-F03.x, F05.1, G30.x, G31.1                                                                                                                                                                                                                                             |
| Chronic pulmonary disease   | ICD 10 codes in the concomitant or complication diagnoses | I27.8, I27.9, J40.x-J47.x, J60.x-J67.x, J68.4, J70.1, J70.3                                                                                                                                                                                                                  |
| Rheumatic disease           | ICD 10 codes in the concomitant or complication diagnoses | M05.x, M06.x, M31.5, M32.x-M34.x, M35.1, M35.3, M36.0                                                                                                                                                                                                                        |
| Peptic ulcer disease        | ICD 10 codes in the concomitant or                        | K25.x-K28.x                                                                                                                                                                                                                                                                  |

|                                                                                   |                                                                                     |                                                                                                                                                                               |
|-----------------------------------------------------------------------------------|-------------------------------------------------------------------------------------|-------------------------------------------------------------------------------------------------------------------------------------------------------------------------------|
| Mild liver disease                                                                | complication diagnoses<br>ICD 10 codes in the concomitant or complication diagnoses | B18.x, K70.0–K70.3, K70.9, K71.3–K71.5, K71.7, K73.x, K74.x, K76.0, K76.2–K76.4, K76.8, K76.9, Z94.4                                                                          |
| Diabetes without chronic complications                                            | ICD 10 codes in the concomitant or complication diagnoses                           | E10.0, E10.1, E10.6, E10.8, E10.9, E11.0, E11.1, E11.6, E11.8, E11.9, E12.0, E12.1, E12.6, E12.8, E12.9, E13.0, E13.1, E13.6, E13.8, E13.9, E14.0, E14.1, E14.6, E14.8, E14.9 |
| Diabetes with chronic complications                                               | ICD 10 codes in the concomitant or complication diagnoses                           | E10.2–E10.5, E10.7, E11.2–E11.5, E11.7, E12.2–E12.5, E12.7, E13.2–E13.5, E13.7, E14.2–E14.5, E14.7                                                                            |
| Hemiplegia or paraplegia                                                          | ICD 10 codes in the concomitant or complication diagnoses                           | G04.1, G11.4, G80.1, G80.2, G81.x, G82.x, G83.0–G83.4, G83.9                                                                                                                  |
| Renal disease                                                                     | ICD 10 codes in the concomitant or complication diagnoses                           | I12.0, I13.1, N03.2–N03.7, N05.2–N05.7, N18.x, N19.x, N25.0, Z49.0–Z49.2, Z94.0, Z99.2                                                                                        |
| Any malignancy, including lymphoma and leukemia except malignant neoplasm of skin | ICD 10 codes in the concomitant or complication diagnoses                           | C00.x–C26.x, C30.x–C34.x, C37.x–C41.x, C43.x, C45.x–C58.x, C60.x–C76.x, C81.x–C85.x, C88.x, C90.x–C97.x                                                                       |
| Moderate or severe liver disease                                                  | ICD 10 codes in the concomitant or complication diagnoses                           | I85.0, I85.9, I86.4, I98.2, K70.4, K71.1, K72.1, K72.9, K76.5, K76.6, K76.7                                                                                                   |
| Metastatic solid tumor                                                            | ICD 10 codes in the concomitant or complication diagnoses                           | C77.x–C80.x                                                                                                                                                                   |
| AIDS/HIV                                                                          | ICD 10 codes in the concomitant or complication diagnoses                           | B20.x–B22.x, B24.x                                                                                                                                                            |

---

*ICD* International Classification of Diseases, *AIDS* acquired immune deficiency syndrome, *HIV* human immunodeficiency virus





## Supplemental Table 2

**Supplemental Table S2. The 19 variables used to calculate propensity scores in the regression model**

| Category of variables           | Subcategory of variables                                                                                                   |
|---------------------------------|----------------------------------------------------------------------------------------------------------------------------|
| Patient characteristics         | 1) age, 2) sex                                                                                                             |
| Hospital state                  | 3) hospital volume                                                                                                         |
| Pre-existing condition          | 4) congestive heart failure, 5) chronic kidney disease, 6) hypertension, 7) diabetic nephropathy, 8) Myocardial infarction |
| Laboratory results on admission | 9) creatine, 10) anemia (Hb <11)                                                                                           |
| Primary diagnosis               | 11) trauma, 12) sepsis, 13) cerebrovascular disease, 14) macrovascular disease                                             |
| Concomitant therapy             | 15) ICU admission, 16) emergency operation, 17) NSAIDs, 18) catecholamine, 19) diuretic medication                         |

*ICU* intensive care unit, *NSAIDs* non-steroidal anti-inflammatory drugs

### Supplemental Table 3

**Supplemental Table S3. Risk of outcomes in propensity score-matched groups by age  $\geq 65$  and  $< 65$  years old**

| Subgroup            | Outcomes                   | Non-enhanced CT<br>n (%) | Enhanced CT<br>n (%) | Odds<br>ratio | 95% CI      | P-value |
|---------------------|----------------------------|--------------------------|----------------------|---------------|-------------|---------|
| Age $\geq 65$ years |                            | N=26739                  | N=26739              |               |             |         |
|                     | AKI stage 1-3              | 1576 (5.9)               | 1468 (5.5)           | 0.928         | 0.861-0.999 | 0.046   |
|                     | AKI stage 3                | 270 (1.0)                | 328 (1.2)            | 1.217         | 1.032-1.437 | 0.019   |
|                     | CIN                        | 2663 (10.0)              | 2476 (9.3)           | 0.923         | 0.871-0.978 | 0.006   |
|                     | RRT during hospitalization | 269 (1.0)                | 372 (1.4)            | 1.388         | 1.182-1.632 | <0.001  |
|                     | RRT dependence             | 125 (0.5)                | 166 (0.6)            | 1.330         | 1.048-1.692 | 0.019   |
|                     | In-hospital mortality      | 2332 (8.7)               | 1863 (7.0)           | 0.784         | 0.735-0.836 | <0.001  |
| Age $< 65$ years    |                            | N=16385                  | N=16385              |               |             |         |
|                     | AKI stage 1-3              | 635 (3.9)                | 477 (2.9)            | 0.744         | 0.658-0.841 | 0.487   |
|                     | AKI stage 3                | 154 (0.9)                | 153 (0.9)            | 0.993         | 0.788-1.252 | 1.000   |
|                     | CIN                        | 1281 (7.8)               | 1122 (6.8)           | 0.867         | 0.797-0.943 | 0.001   |
|                     | RRT during hospitalization | 147 (0.9)                | 154 (0.9)            | 1.048         | 0.830-1.324 | 0.728   |
|                     | RRT dependence             | 54 (0.3)                 | 80 (0.5)             | 1.484         | 1.037-2.138 | 0.030   |
|                     | In-hospital mortality      | 524 (3.2)                | 440 (2.7)            | 0.835         | 0.733-0.952 | 0.007   |

*CT* computed tomography, *CI* confidence interval, *AKI* acute kidney injury, *CIN* contrast-induced nephropathy, *RRT* renal replacement therapy

## Supplemental Table 4

**Supplemental Table S4. Risk of outcomes in propensity score-matched groups by sex**

| Subgroup    | Outcomes                   | Non-enhanced CT<br>n (%) | Enhanced CT<br>n (%) | Odds<br>ratio | 95% CI      | P-value |
|-------------|----------------------------|--------------------------|----------------------|---------------|-------------|---------|
| Sex, male   |                            | N=24029                  | N=24029              |               |             |         |
|             | AKI stage 1-3              | 1275 (5.3)               | 1194 (5.0)           | 0.933         | 0.860-1.013 | 0.098   |
|             | AKI stage 3                | 256 (1.1)                | 305 (1.3)            | 1.194         | 1.007-1.417 | 0.041   |
|             | CIN                        | 2028 (8.4)               | 1915 (8.0)           | 0.939         | 0.880-1.003 | 0.063   |
|             | RRT during hospitalization | 265 (1.1)                | 334 (1.4)            | 1.264         | 1.071-1.492 | 0.005   |
|             | RRT dependence             | 130 (0.5)                | 173 (0.7)            | 1.333         | 1.055-1.688 | 0.015   |
|             | In-hospital mortality      | 1698 (7.1)               | 1334 (5.6)           | 0.773         | 0.717-0.833 | <0.001  |
| Sex, female |                            | N=19279                  | N=19279              |               |             |         |
|             | AKI stage 1-3              | 927 (4.8)                | 777 (4.0)            | 0.831         | 0.753-0.918 | <0.001  |
|             | AKI stage 3                | 186 (1.0)                | 183 (0.9)            | 0.984         | 0.797-1.214 | 0.917   |
|             | CIN                        | 1879 (9.7)               | 1719 (8.9)           | 0.907         | 0.846-0.972 | 0.005   |
|             | RRT during hospitalization | 178 (0.9)                | 197 (1.0)            | 1.108         | 0.899-1.366 | 0.350   |
|             | RRT dependence             | 80 (0.4)                 | 76 (0.4)             | 0.950         | 0.684-1.318 | 0.810   |
|             | In-hospital mortality      | 1202 (6.2)               | 1001 (5.2)           | 0.824         | 0.755-0.899 | <0.001  |

*CT* computed tomography, *CI* confidence interval, *AKI* acute kidney injury, *CIN* contrast-induced nephropathy, *RRT* renal replacement therapy



## Supplemental Table 5

**Supplemental Table S5. Risk of outcomes in propensity score-matched groups by diagnostic diseases on admission**

| Subgroup              | Outcomes                   | Non-enhanced CT | Enhanced CT | Odds ratio | 95% CI      | P-value |
|-----------------------|----------------------------|-----------------|-------------|------------|-------------|---------|
|                       |                            | n (%)           | n (%)       |            |             |         |
| Trauma                |                            | N=2998          | N=2998      |            |             |         |
|                       | AKI stage 1-3              | 114 (3.8)       | 140 (4.7)   | 1.239      | 0.955-1.610 | 0.109   |
|                       | AKI stage 3                | 5 (0.2)         | 20 (0.7)    | 4.019      | 1.461-13.72 | 0.004   |
|                       | CIN                        | 207 (6.9)       | 231 (7.7)   | 1.126      | 0.922-1.375 | 0.254   |
|                       | RRT during hospitalization | 11 (0.4)        | 21 (0.7)    | 1.915      | 0.881-4.407 | 0.109   |
|                       | RRT dependence             | 10 (0.3)        | 10 (0.3)    | 1.000      | 0.373-2.682 | 1.000   |
|                       | In-hospital mortality      | 93 (3.1)        | 140 (4.7)   | 1.530      | 1.162-2.021 | 0.002   |
| Sepsis                |                            | N=2604          | N=2604      |            |             |         |
|                       | AKI stage 1-3              | 360 (13.8)      | 355 (13.6)  | 0.984      | 0.838-1.156 | 0.872   |
|                       | AKI stage 3                | 134 (5.1)       | 167 (6.4)   | 1.263      | 0.993-1.609 | 0.057   |
|                       | CIN                        | 361 (13.9)      | 344 (13.2)  | 0.946      | 0.804-1.112 | 0.517   |
|                       | RRT during hospitalization | 144 (5.5)       | 196 (7.5)   | 1.390      | 1.107-1.749 | 0.004   |
|                       | RRT dependence             | 57 (2.2)        | 66 (2.5)    | 1.162      | 0.799-1.694 | 0.466   |
|                       | In-hospital mortality      | 377 (14.5)      | 310 (11.9)  | 0.796      | 0.675-0.938 | 0.006   |
| Macrovascular disease |                            | N=420           | N=420       |            |             |         |
|                       | AKI stage 1-3              | 71 (16.9)       | 77 (18.3)   | 1.103      | 0.761-1.600 | 0.651   |
|                       | AKI stage 3                | 16 (3.8)        | 28 (6.7)    | 1.802      | 0.925-3.626 | 0.087   |

|                         |                            |            |            |       |             |       |
|-------------------------|----------------------------|------------|------------|-------|-------------|-------|
|                         | CIN                        | 85 (20.2)  | 78 (18.6)  | 0.899 | 0.629-1.284 | 0.601 |
|                         | RRT during hospitalization | 27 (6.4)   | 30 (7.1)   | 1.120 | 0.630-1.997 | 0.784 |
|                         | RRT dependence             | 16 (3.8)   | 17 (4.0)   | 1.065 | 0.498-2.287 | 1.000 |
|                         | In-hospital mortality      | 49 (11.7)  | 36 (8.6)   | 0.710 | 0.438-1.143 | 0.169 |
| Cerebrovascular disease |                            | N=2963     | N=2963     |       |             |       |
|                         | AKI stage 1-3              | 177 (6.0)  | 186 (6.3)  | 1.054 | 0.848-1.312 | 0.665 |
|                         | AKI stage 3                | 24 (0.8)   | 25 (0.8)   | 1.042 | 0.570-1.910 | 1.000 |
|                         | CIN                        | 337 (11.4) | 330 (11.1) | 0.977 | 0.828-1.151 | 0.805 |
|                         | RRT during hospitalization | 18 (0.6)   | 29 (1.0)   | 1.617 | 0.866-3.099 | 0.142 |
|                         | RRT dependence             | 10 (0.3)   | 17 (0.6)   | 1.704 | 0.735-4.171 | 0.247 |
|                         | In-hospital mortality      | 282 (9.5)  | 295 (10.0) | 1.051 | 0.882-1.253 | 0.599 |

*CT* computed tomography, *CI* confidence interval, *AKI* acute kidney injury, *CIN* contrast-induced nephropathy, *RRT* renal replacement therapy, *Inf* infinity

## Supplemental Table 6

**Supplemental Table S6. Risk of outcomes in propensity score-matched groups with and without underlying CKD**

| Subgroup    | Outcomes                   | Non-enhanced CT<br>n (%) | Enhanced CT<br>n (%) | Odds<br>ratio | 95% CI      | P-value |
|-------------|----------------------------|--------------------------|----------------------|---------------|-------------|---------|
| With CKD    |                            | N=544                    | N=544                |               |             |         |
|             | AKI stage 1-3              | 110 (20.2)               | 188 (34.6)           | 2.082         | 1.571-2.769 | <0.001  |
|             | AKI stage 3                | 39 (7.2)                 | 108 (19.9)           | 3.204         | 2.150-4.857 | <0.001  |
|             | CIN                        | 95 (17.5)                | 143 (26.3)           | 1.685         | 1.246-2.285 | 0.001   |
|             | RRT during hospitalization | 50 (9.2)                 | 134 (24.6)           | 3.226         | 2.251-4.680 | <0.001  |
|             | RRT dependence             | 27 (5.0)                 | 89 (16.4)            | 3.741         | 2.359-6.100 | <0.001  |
|             | In-hospital mortality      | 57 (10.5)                | 70 (12.9)            | 1.261         | 0.856-1.866 | 0.257   |
| Without CKD |                            | N=42793                  | N=42793              |               |             |         |
|             | AKI stage 1-3              | 2124 (5.0)               | 1785 (4.2)           | 0.833         | 0.781-0.889 | <0.001  |
|             | AKI stage 3                | 396 (0.9)                | 376 (0.9)            | 0.949         | 0.821-1.096 | 0.492   |
|             | CIN                        | 3836 (9.0)               | 3516 (8.2)           | 0.909         | 0.866-0.954 | <0.001  |
|             | RRT during hospitalization | 393 (0.9)                | 396 (0.9)            | 1.008         | 0.874-1.162 | 0.943   |
|             | RRT dependence             | 170 (0.4)                | 151 (0.4)            | 0.888         | 0.708-1.112 | 0.314   |
|             | In-hospital mortality      | 2800 (6.5)               | 2259 (5.3)           | 0.796         | 0.751-0.843 | <0.001  |

*CKD* chronic kidney disease, *CT* computed tomography, *CI* confidence interval, *AKI* acute kidney injury, *CIN* contrast-induced nephropathy, *RRT* renal replacement therapy





**Supplemental Table 7**

**Supplemental Table S7. Risk of outcomes in propensity score-matched groups with and without ICU admission**

| Subgroup                | Outcomes                   | Non-enhanced CT | Enhanced CT | Odds ratio | 95% CI      | P-value |
|-------------------------|----------------------------|-----------------|-------------|------------|-------------|---------|
|                         |                            | n (%)           | n (%)       |            |             |         |
| ICU admission           |                            | N=2705          | N=2705      |            |             |         |
|                         | AKI stage 1-3              | 441 (16.3)      | 410 (15.2)  | 0.917      | 0.790-1.065 | 0.263   |
|                         | AKI stage 3                | 146 (5.4)       | 154 (5.7)   | 1.058      | 0.832-1.345 | 0.678   |
|                         | CIN                        | 502 (18.6)      | 432 (16.0)  | 0.834      | 0.722-0.963 | 0.013   |
|                         | RRT during hospitalization | 144 (5.3)       | 176 (6.5)   | 1.238      | 0.980-1.564 | 0.074   |
|                         | RRT dependence             | 52 (1.9)        | 59 (2.2)    | 1.137      | 0.767-1.692 | 0.565   |
|                         | In-hospital mortality      | 356 (13.2)      | 347 (12.8)  | 0.971      | 0.826-1.141 | 0.746   |
| General wards admission |                            | N=40467         | N=40467     |            |             |         |
|                         | AKI stage 1-3              | 1731 (4.3)      | 1532 (3.8)  | 0.881      | 0.820-0.945 | <0.001  |
|                         | AKI stage 3                | 287 (0.8)       | 310 (0.8)   | 1.081      | 0.917-1.274 | 0.366   |
|                         | CIN                        | 3312 (8.2)      | 3183 (8.1)  | 0.958      | 0.910-1.008 | 0.098   |
|                         | RRT during hospitalization | 297 (0.7)       | 332 (0.8)   | 1.119      | 0.953-1.314 | 0.173   |
|                         | RRT dependence             | 148 (0.4)       | 187 (0.5)   | 1.265      | 1.013-1.581 | 0.037   |
|                         | In-hospital mortality      | 2428 (6.0)      | 1956 (4.8)  | 0.796      | 0.748-0.846 | <0.001  |

*CT* computed tomography, *CI* confidence interval, *ICU* intensive care unit, *AKI* acute kidney injury, *CIN* contrast-induced nephropathy, *RRT* renal replacement therapy



## Supplemental Table 8

**Supplemental Table S8. Risk of outcomes in propensity score-matched groups with and without organ dysfunction**

| Subgroup                  | Outcomes                   | Non-enhanced CT<br>n (%) | Enhanced CT<br>n (%) | Odds<br>ratio | 95% CI      | P-value |
|---------------------------|----------------------------|--------------------------|----------------------|---------------|-------------|---------|
| With organ dysfunction    |                            | N=9934                   | N=9934               |               |             |         |
|                           | AKI stage 1-3              | 1098 (11.1)              | 1029 (10.4)          | 0.930         | 0.849-1.018 | 0.119   |
|                           | AKI stage 3                | 302 (3.0)                | 343 (3.5)            | 1.141         | 0.972-1.339 | 0.109   |
|                           | CIN                        | 1421 (14.3)              | 1343 (13.5)          | 0.937         | 0.863-1.016 | 0.114   |
|                           | RRT during hospitalization | 330 (3.3)                | 395 (4.3)            | 1.205         | 1.036-1.403 | 0.015   |
|                           | RRT dependence             | 113 (1.1)                | 153 (1.5)            | 1.359         | 1.057-1.752 | 0.016   |
|                           | In-hospital mortality      | 1387 (14.0)              | 1298 (13.1)          | 0.926         | 0.853-1.006 | 0.068   |
| Without organ dysfunction |                            | N=32606                  | N=32606              |               |             |         |
|                           | AKI stage 1-3              | 990 (3.0)                | 914 (2.8)            | 0.921         | 0.840-1.010 | 0.081   |
|                           | AKI stage 3                | 93 (0.3)                 | 119 (0.4)            | 1.281         | 0.968-1.699 | 0.085   |
|                           | CIN                        | 2241 (6.9)               | 2265 (6.9)           | 1.012         | 0.952-1.075 | 0.098   |
|                           | RRT during hospitalization | 73 (0.2)                 | 116 (0.4)            | 1.591         | 1.177-2.164 | 0.002   |
|                           | RRT dependence             | 61 (0.2)                 | 90 (0.3)             | 1.477         | 1.055-2.080 | 0.022   |
|                           | In-hospital mortality      | 1188 (3.6)               | 997 (3.1)            | 0.834         | 0.765-0.910 | <0.001  |

*CT* computed tomography, *CI* confidence interval, *AKI* acute kidney injury, *CIN* contrast-induced nephropathy, *RRT* renal replacement therapy



## Supplemental Table 9

| <b>Supplemental Table S9. Sensitivity analysis for the risk of outcomes on enhanced CT in a logistic regression model</b> |             |                     |             |                           |
|---------------------------------------------------------------------------------------------------------------------------|-------------|---------------------|-------------|---------------------------|
| Outcomes                                                                                                                  | Subset      | Adjusted Odds ratio | 95% CI      | <i>P for interaction*</i> |
| AKI stage 1-3                                                                                                             | Overall     | 0.903               | 0.853-0.957 |                           |
|                                                                                                                           | With CKD    | 2.210               | 1.761-2.770 | <0.001                    |
|                                                                                                                           | Without CKD | 0.858               | 0.809-0.911 |                           |
| AKI stage 3                                                                                                               | Overall     | 1.300               | 1.140-1.470 |                           |
|                                                                                                                           | With CKD    | 3.780               | 2.720-5.230 | <0.001                    |
|                                                                                                                           | Without CKD | 1.090               | 0.950-1.260 |                           |
| CIN                                                                                                                       | Overall     | 1.010               | 0.970-1.060 |                           |
|                                                                                                                           | With CKD    | 1.850               | 1.470-2.310 | <0.001                    |
|                                                                                                                           | Without CKD | 0.986               | 0.944-1.030 |                           |
| RRT during hospitalization                                                                                                | Overall     | 1.370               | 1.210-1.550 |                           |
|                                                                                                                           | With CKD    | 3.850               | 2.860-5.170 | <0.001                    |
|                                                                                                                           | Without CKD | 1.140               | 0.995-1.310 |                           |
| RRT dependence                                                                                                            | Overall     | 1.280               | 1.080-1.530 |                           |
|                                                                                                                           | With CKD    | 3.370               | 2.351-4.802 | <0.001                    |
|                                                                                                                           | Without CKD | 0.990               | 0.850-1.211 |                           |
| In-hospital mortality                                                                                                     | Overall     | 0.837               | 0.795-0.881 |                           |

|             |       |             |        |
|-------------|-------|-------------|--------|
| With CKD    | 1.140 | 0.853-1.520 | <0.001 |
| Without CKD | 0.831 | 0.789-0.876 |        |

---

*CT* computed tomography, *CI* confidence interval, *ICU* intensive care unit, *AKI* acute kidney injury, *CIN* contrast-induced nephropathy, *RRT* renal replacement therapy, *CKD* chronic kidney disease

\* The value of the interaction term between enhanced CT and CKD

Independent variables: enhanced CT, age, sex, hospital volume, congestive heart failure, chronic kidney disease, hypertension, diabetic nephropathy, myocardial infarction, serum creatine, anemia (Hb <11), trauma, sepsis, cerebrovascular disease, macrovascular disease, ICU admission, emergency operation, NSAIDs, catecholamine, diuretic medication, and interaction term between enhanced CT and CKD.
